# Supplementary material
Source: HighWire-hosted journal article supplement (https://www.cmaj.ca/highwire/filestream/77468/field_highwire_adjunct_files/0/200715-res-1-at.pdf)

**Appendix 1 (as submitted by the authors): Supplementary tables and figures**

**A1. Number of new COVID-19 cases over time over 60 days, per day**

| <b>Day</b> | <b>Expected<br/>(Ontario)</b> | <b>Worst-Case<br/>(Italy)</b> | <b>Best-Case<br/>(South Korea)</b> |
|------------|-------------------------------|-------------------------------|------------------------------------|
| 0          | 22                            | 74                            | 100                                |
| 1          | 23                            | 93                            | 229                                |
| 2          | 29                            | 131                           | 169                                |
| 3          | 44                            | 202                           | 231                                |
| 4          | 60                            | 233                           | 144                                |
| 5          | 84                            | 240                           | 284                                |
| 6          | 88                            | 566                           | 505                                |
| 7          | 101                           | 342                           | 571                                |
| 8          | 132                           | 466                           | 813                                |
| 9          | 125                           | 587                           | 586                                |
| 10         | 150                           | 769                           | 599                                |
| 11         | 208                           | 778                           | 851                                |
| 12         | 222                           | 1,247                         | 435                                |
| 13         | 230                           | 1,492                         | 467                                |
| 14         | 211                           | 1,797                         | 505                                |
| 15         | 286                           | 977                           | 448                                |
| 16         | 227                           | 2,313                         | 273                                |
| 17         | 221                           | 0                             | 164                                |
| 18         | 268                           | 5,198                         | 35                                 |
| 19         | 219                           | 3,497                         | 242                                |
| 20         | 259                           | 3,590                         | 114                                |
| 21         | 267                           | 3,233                         | 110                                |
| 22         | 283                           | 3,526                         | 107                                |
| 23         | 255                           | 4,207                         | 76                                 |
| 24         | 229                           | 5,322                         | 74                                 |
| 25         | 347                           | 5,986                         | 84                                 |
| 26         | 305                           | 6,557                         | 93                                 |
| 27         | 415                           | 5,560                         | 152                                |
| 28         | 347                           | 4,789                         | 87                                 |
| 29         | 378                           | 5,249                         | 147                                |
| 30         | 310                           | 5,210                         | 162                                |
| 31         | 347                           | 6,203                         | 0                                  |
| 32         | 418                           | 5,909                         | 76                                 |
| 33         | 412                           | 5,974                         | 100                                |
| 34         | 388                           | 5,217                         | 104                                |

|    |     |       |     |
|----|-----|-------|-----|
| 35 | 441 | 4,050 | 91  |
| 36 | 477 | 4,053 | 146 |
| 37 | 534 | 4,782 | 105 |
| 38 | 380 | 4,668 | 78  |
| 39 | 696 | 4,585 | 125 |
| 40 | 577 | 4,805 | 101 |
| 41 | 548 | 4,316 | 89  |
| 42 | 521 | 3,599 | 86  |
| 43 | 495 | 3,039 | 94  |
| 44 | 470 | 3,836 | 81  |
| 45 | 446 | 4,204 | 47  |
| 46 | 424 | 3,951 | 47  |
| 47 | 403 | 4,694 | 53  |
| 48 | 383 | 4,092 | 39  |
| 49 | 364 | 3,153 | 27  |
| 50 | 345 | 2,972 | 30  |
| 51 | 328 | 2,667 | 32  |
| 52 | 312 | 3,786 | 25  |
| 53 | 296 | 3,493 | 27  |
| 54 | 281 | 3,491 | 27  |
| 55 | 267 | 3,047 | 22  |
| 56 | 254 | 2,256 | 22  |
| 57 | 241 | 2,729 | 18  |
| 58 | 229 | 3,370 | 8   |
| 59 | 218 | 2,646 | 13  |
| 60 | 207 | 3,021 | 9   |

## A2. Figures

Figure. Resource depletion for Scenario with Best Case Epidemic Trajectory and Base case resources

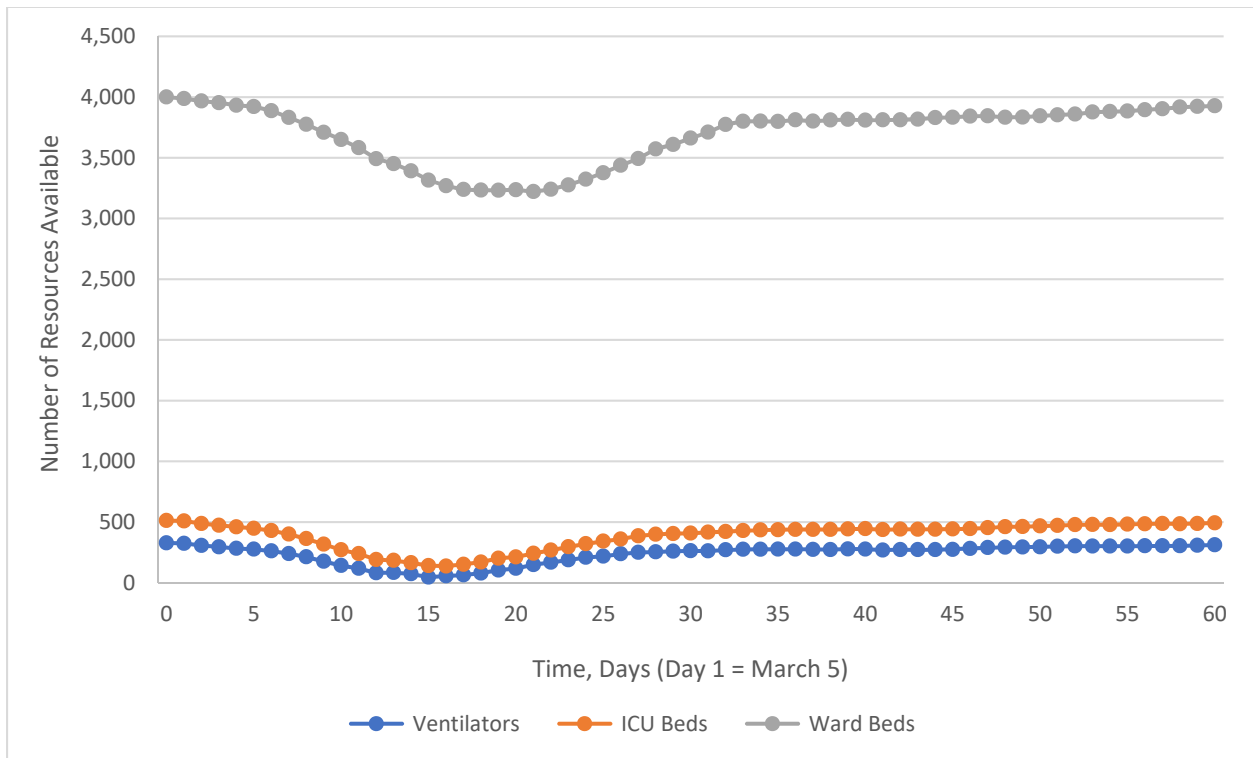

**Figure. Resource depletion for Scenario with Worst-case epidemic scenario and Base case resources**

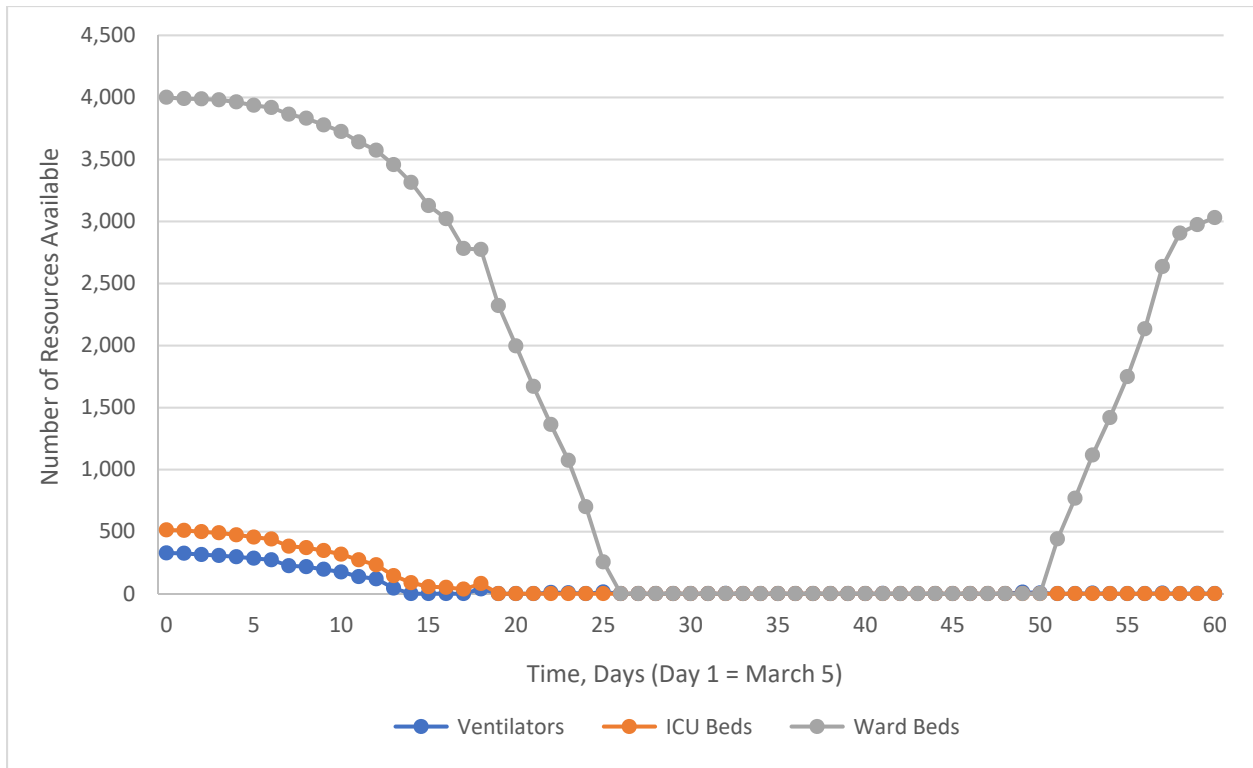

**Figure. Resource depletion for Scenario with Worst-case epidemic trajectory and Surge capacity resources**

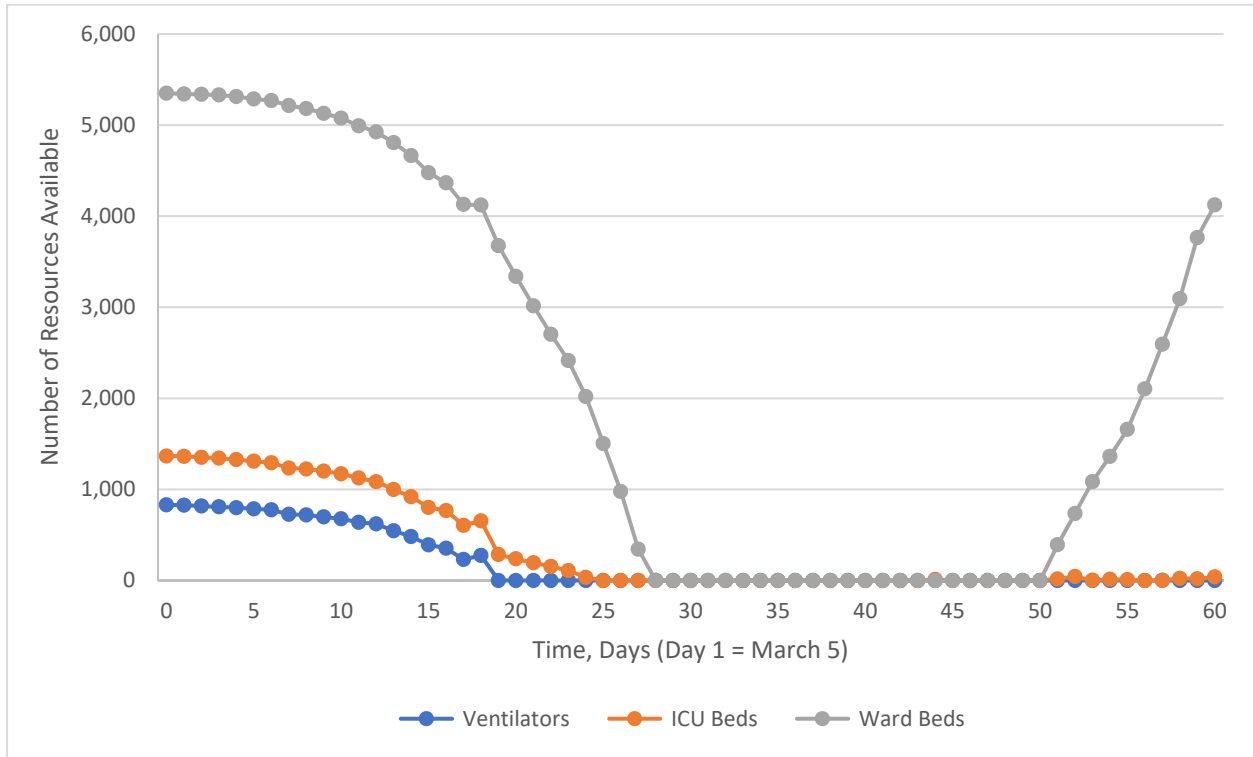

**Figure. Resource depletion for Scenario with Worst-case epidemic trajectory and Vast expansion of resources**

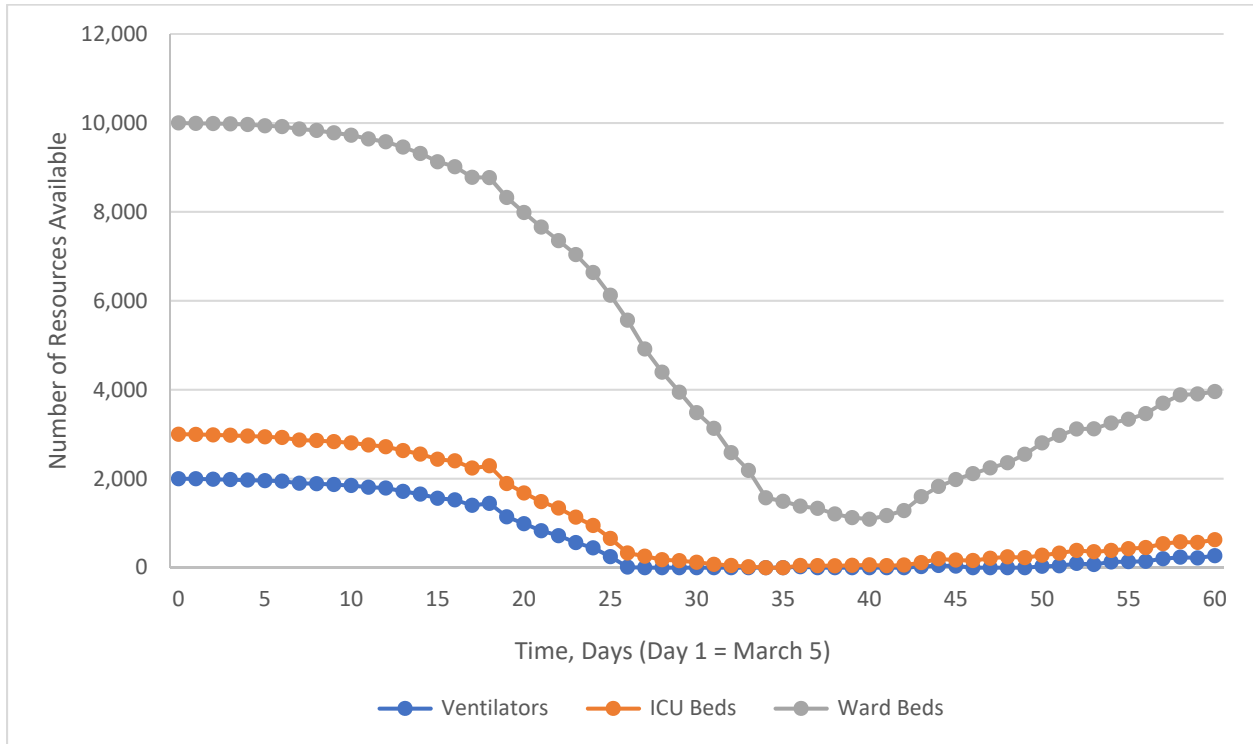

Supplement: 200715-res-1-at.pdf [file 200715-res-1-at.pdf]
